# Supplementary material for: Bilateral Renal Tumors in Children: The First 5 Years’ Experience of National Centralization in The Netherlands and a Narrative Review of the Literature
Source: MDPI journal article supplement (doi:10.3390/jcm10235558), 2021-11-26
Supplement: s1 [file s1]

**Table S1.** Search terms

|               |                                                                                                                                                                                                                                                                                                                                                                                                                                                                                                                                                                                                                                                                                                                                                                                                                                                                                                                                                                                                                                                                                                                                                                                                                                                                                                                                                         |
|---------------|---------------------------------------------------------------------------------------------------------------------------------------------------------------------------------------------------------------------------------------------------------------------------------------------------------------------------------------------------------------------------------------------------------------------------------------------------------------------------------------------------------------------------------------------------------------------------------------------------------------------------------------------------------------------------------------------------------------------------------------------------------------------------------------------------------------------------------------------------------------------------------------------------------------------------------------------------------------------------------------------------------------------------------------------------------------------------------------------------------------------------------------------------------------------------------------------------------------------------------------------------------------------------------------------------------------------------------------------------------|
| <b>Embase</b> | (bilateral:ab,ti OR (stage AND v:ab,ti) OR (stage AND 5:ab,ti)) AND (wilm*:ab,ti OR nephroblastom*:ab,ti)<br>(bilateral;ab,ti OR (stage AND v:ab,ti) OR (stage AND 5:ab,ti)) AND (CCSK:ab,ti OR clear cell sarcoma of the kidney:ab,ti)<br>(bilateral:ab,ti OR (stage AND v:ab,ti) OR (stage AND 5:ab,ti)) AND (MRTK:ab,ti OR malignant rhabdoid tumor of the kidney:ab,ti)<br>(bilateral:ab,ti OR (stage AND v:ab,ti) OR (stage AND 5:ab,ti)) AND (RCC:ab,ti OR renal cell carcinoma:ab,ti)<br>(bilateral:ab,ti OR (stage AND v:ab,ti) OR (stage AND 5:ab,ti)) AND (CN:ab,ti OR cystic nephroma:ab,ti)<br>(bilateral:ab,ti OR (stage AND v:ab,ti) OR (stage AND 5:ab,ti)) AND (CPDN:ab,ti OR cystic partially differentiated nephroblastoma:ab,ti)<br>(bilateral:ab,ti OR (stage AND v:ab,ti) OR (stage AND 5:ab,ti)) AND (CMN:ab,ti OR MN:ab,ti) OR (mesoblastic nephrom*:ab,ti)                                                                                                                                                                                                                                                                                                                                                                                                                                                                      |
| <b>PubMed</b> | ("bilateral"[Title/Abstract] OR "stage v"[Title/Abstract] OR "stage 5"[Title/Abstract]) AND ("wilm*" [Title/Abstract] OR "nephroblastom*" [Title/Abstract])<br>("bilateral"[Title/Abstract] OR "stage v"[Title/Abstract] OR "stage 5"[Title/Abstract]) AND ("CCSK"[Title/Abstract] OR "clear cell sarcoma of the kidney" [Title/Abstract])<br>("bilateral"[Title/Abstract] OR "stage v"[Title/Abstract] OR "stage 5"[Title/Abstract]) AND ("MRTK"[Title/Abstract] OR "malignant rhabdoid tumor of the kidney" [Title/Abstract])<br>("bilateral"[Title/Abstract] OR "stage v"[Title/Abstract] OR "stage 5"[Title/Abstract]) AND ("RCC"[Title/Abstract] OR "renal cell" [Title/Abstract]) AND ("child*" [Title/Abstract] OR "pediatr*" [Title/Abstract])<br>("bilateral"[Title/Abstract] OR "stage v"[Title/Abstract] OR "stage 5"[Title/Abstract]) AND ("CN"[Title/Abstract] OR "cystic nephrom*" [Title/Abstract]) AND ("child*" [Title/Abstract] OR "pediatr*" [Title/Abstract])<br>("bilateral"[Title/Abstract] OR "stage v"[Title/Abstract] OR "stage 5"[Title/Abstract]) AND ("CPDN"[Title/Abstract] OR "cystic partially differentiated nephroblastom*" [Title/Abstract])<br>("bilateral"[Title/Abstract] OR "stage v"[Title/Abstract] OR "stage 5"[Title/Abstract]) AND ("CMN"[Title/Abstract] OR "MN"[Title/Abstract] OR "mesoblastic nephrom*") |

**Table S2.** Detailed information of 24 patients with bilateral renal tumors.

| Pt No. | Sex | Age (mths) | Metastasi zed disease | HTN at Dx | Preop CT | Tumor volume response (%) |       | Surgery type |                | Local stage |      | Tumor histology |                   | Postop therapy |     | Outcome         |       | eGFR last FU (ml/min/ 1.73m²) | FU (mths) |
|--------|-----|------------|-----------------------|-----------|----------|---------------------------|-------|--------------|----------------|-------------|------|-----------------|-------------------|----------------|-----|-----------------|-------|-------------------------------|-----------|
|        |     |            |                       |           |          | L                         | R     | L            | R              | L           | R    | L               | R                 | CT             | RTx | Relap se        | Death |                               |           |
| 1      | F   | 44         | No                    | No        | VA       | -91                       | -93   | NSS          | NSS            | I           | III  | RT-WT           | RT-WT             | Yes            | Yes | No              | No    | >90                           | 74        |
|        |     |            |                       |           |          | NA                        | NA    |              |                |             |      | NB (PLNR)       | NB (PLNR)         |                |     |                 |       |                               |           |
| 2      | M   | 46         | No                    | Yes       | VA-D     | -93                       | -73   | NSS          | TN             | I           | I    | RT-WT           | RT-WT             | Yes            | No  | No              | No    | >90                           | 66        |
| 3      | M   | 52         | No                    | Yes       | VA       | -87                       | -66   | NSS          | TN             | III         | I    | BT-WT           | ST-WT             | Yes            | Yes | No              | Yes   | <15                           | 20 (died) |
|        |     |            |                       |           |          | -100                      | NA    |              |                |             |      | RT-WT           | NB (PLNR)         |                |     |                 |       |                               |           |
| 4      | F   | 11         | No                    | Yes       | VA-CE    | +43                       | -30.5 | TN           | NSS (3y later) | I           | III^ | ST-WT           | ST-WT (2nd tumor) | Yes            | No  | No <sup>#</sup> | No    | >90                           | 58        |
|        |     |            |                       |           |          |                           | -6.5  |              |                |             |      |                 | NB (ILNR)         |                |     |                 |       |                               |           |
| 5      | F   | 56         | No                    | No        | VA       | -90                       | -95   | B            | TN             | I           | II   | CNT-WT          | DA-WT             | Yes            | No  | No              | No    | >90                           | 51        |
|        |     |            |                       |           |          |                           | -33   |              |                |             |      |                 | RT-WT             |                |     |                 |       |                               |           |
|        |     |            |                       |           |          | NA                        | -15   |              |                |             |      | NB (PLNR)       | TLNR*             |                |     |                 |       |                               |           |
|        |     |            |                       |           |          |                           | NA    |              |                |             |      | NB (PLNR)       |                   |                |     |                 |       |                               |           |
| 6      | M   | 57         | Yes (osseous Th10)    | Yes       | VAD      | -78                       | -77   | NSS          | NSS            | III         | I    | RT-WT           | CNT-WT            | Yes            | Yes | No              | No    | >90                           | 33        |
|        |     |            |                       |           |          | Stable                    | -80   |              |                |             |      | NB (PLNR)       | NB (PLNR)         |                |     |                 |       |                               |           |
| 7      | F   | 59         | Yes (pulmonar y)      | Yes       | VAD      | -79                       | -98   | TN           | NSS            | III         | I    | DA-WT           | RT-WT             | Yes            | Yes | No              | No    | 89                            | 27        |
|        |     |            |                       |           |          | -67                       | NA    |              |                |             |      | DA-WT           | NB (PLNR)         |                |     |                 |       |                               |           |
|        |     |            |                       |           |          | NA                        |       |              |                |             |      | NB (PLNR)       |                   |                |     |                 |       |                               |           |
| 8      | M   | 49         | Yes (pulmonar y)      | Yes       | VA-D     | +29                       | -59   | TN           | None           | III         | NA   | DA-WT           | DA-WT             | Yes            | Yes | No              | Yes   | <15                           | 12 (died) |
| 9      | F   | 15         | No                    | Yes       | VA-D     | -77                       | -91   | NSS          | NSS            | NA          | I    | PLNR*           | BT-WT             | Yes            | No  | No              | No    | >90                           | 34        |
|        |     |            |                       |           |          |                           | NA    |              |                |             |      |                 | NB (PLNR)         |                |     |                 |       |                               |           |

|    |   |    |                                           |     |       |                |                   |      |      |    |     |                   |                        |     |     |                 |    |     |    |
|----|---|----|-------------------------------------------|-----|-------|----------------|-------------------|------|------|----|-----|-------------------|------------------------|-----|-----|-----------------|----|-----|----|
| 10 | F | 21 | No                                        | Yes | VA    | -100           | -91               | None | TN   | NA | III | PLNR <sup>1</sup> | RT-WT                  | Yes | Yes | No              | No | >90 | 63 |
|    |   |    |                                           |     |       |                | -97               |      |      |    |     |                   | RT-WT                  |     |     |                 |    |     |    |
|    |   |    |                                           |     |       |                | -94               |      |      |    |     |                   | NB (PLNR)              |     |     |                 |    |     |    |
|    |   |    |                                           |     |       |                | -100              |      |      |    |     |                   | PLNR                   |     |     |                 |    |     |    |
| 11 | F | 54 | No                                        | No  | VA    | -78            | ↓ <sup>3</sup>    | TN   | B    | I  | NA  | RT-WT             | NR*                    | Yes | No  | No              | No | >90 | 49 |
|    |   |    |                                           |     |       | NA             |                   |      |      |    |     | PLNR              |                        |     |     |                 |    |     |    |
| 12 | F | 51 | No                                        | Yes | VA    | -75            | >-10 <sup>2</sup> | TN   | NSS  | II | NA  | RT-WT             | PLNR*                  | Yes | No  | No              | No | >90 | 48 |
|    |   |    |                                           |     |       | NA             |                   |      |      |    |     | RT-WT             |                        |     |     |                 |    |     |    |
|    |   |    |                                           |     |       | NA             |                   |      |      |    |     | NB (PLNR)         |                        |     |     |                 |    |     |    |
| 13 | F | 38 | No                                        | Yes | VA    | Stable         | -71               | B    | TN   | NA | I   | NB                | RT-WT                  | Yes | No  | No              | No | >90 | 60 |
|    |   |    |                                           |     |       |                | NA                |      |      |    |     |                   | NB (PLNR+ILNR)         |     |     |                 |    |     |    |
| 14 | M | 9  | No                                        | Yes | VA-D  | -1.4           | -60               | TN   | NSS  | I  | NA  | ST-WT             | NB (ILNR)*             | Yes | No  | No              | No | >90 | 33 |
| 15 | F | 12 | No                                        | Yes | VA-CE | ↓ <sup>3</sup> | +164              | None | TN   | II | NA  | NR <sup>1</sup>   | ST-WT                  | Yes | No  | No              | No | >90 | 29 |
|    |   |    |                                           |     |       |                | +48.2             |      |      |    |     |                   | ST-WT                  |     |     |                 |    |     |    |
| 16 | M | 19 | No                                        | No  | VA    | -90            | ↓ <sup>3</sup>    | NSS  | None | NA | I   | MT-WT             | NB (PLNR) <sup>1</sup> | Yes | No  | No <sup>#</sup> | No | >90 | 28 |
|    |   |    |                                           |     |       | ↓ <sup>3</sup> |                   |      |      |    |     | NB (PLNR)         |                        |     |     |                 |    |     |    |
| 17 | F | 24 | No                                        | No  | VA    | -77            | Stable            | TN   | None | II | NA  | ST-WT             | NB (ILNR) <sup>1</sup> | Yes | No  | No              | No | >90 | 21 |
|    |   |    |                                           |     |       | NA             |                   |      |      |    |     | ILNR              |                        |     |     |                 |    |     |    |
| 18 | M | 7  | No                                        | Yes | VA    | Stable         | +59               | None | TN   | NA | I   | NB <sup>1</sup>   | ST-WT                  | Yes | No  | No <sup>#</sup> | No | >90 | 19 |
|    |   |    |                                           |     |       |                | NA                |      |      |    |     |                   | ILNR                   |     |     |                 |    |     |    |
| 19 | F | 51 | Yes (m. psoas + pulmonary + osseous Th12) | Yes | VAD   | Stable         | -91               | None | TN   | NA | III | NB <sup>1</sup>   | RT-WT                  | Yes | Yes | No              | No | >90 | 36 |
| 20 | M | 17 | No                                        | Yes | VA    | -34.5          | +145              | None | TN   | NA | III | NB <sup>1</sup>   | ST-WT                  | Yes | Yes | No              | No | >90 | 32 |

|    |   |     |    |     |    |                   |                |      |      |    |   |                                |                                |     |    |    |    |     |    |
|----|---|-----|----|-----|----|-------------------|----------------|------|------|----|---|--------------------------------|--------------------------------|-----|----|----|----|-----|----|
|    |   |     |    |     |    |                   | Stable         |      |      |    |   |                                | NB<br>(PLNR+ILNR)              |     |    |    |    |     |    |
| 21 | M | 12  | No | Yes | VA | ↓ <sup>3</sup>    | ↓ <sup>3</sup> | None | B    | NA |   | NB <sup>1</sup>                | NB <sup>1</sup>                | NA  | No | No | No | >90 | 36 |
| 22 | M | 24  | No | No  | VA | >-10 <sup>2</sup> | -97            | NSS  | NSS  | NA |   | NB<br>(PLNR)                   | NB (PLNR)                      | Yes | No | No | No | >90 | 23 |
| 23 | M | 25  | No | Yes | VA | Stable            | Stable         | None | None | NA |   | NB <sup>1</sup><br>(PLNR+ILNR) | NB <sup>1</sup><br>(PLNR+ILNR) | NA  | No | No | No | >90 | 62 |
| 24 | F | 184 | No | No  | No | NA                | NA             | None | TN   | NA | I | NA                             | Papillary<br>RCC type 2        | No  | No | No | No | >90 | 60 |

Pt. no: patient number; mths: months; Dx: diagnosis; M: male; F: female; HTN: hypertension; NSS: nephron sparing surgery; TN: tumornephrectomy; B: biopsy; RT: regressive type; ST: stromal type; BT: blastemal type; DA: diffuse anaplastic; CNT: completely necrotic type; MT: mixed type; WT: Wilms tumor; NB: nephroblastomatosis; NR: nephrogenic rest; PLNR: perilobar nephrogenic rest; ILNR: intralobar nephrogenic rest; TLNR: tumor like nephrogenic rest; preop: preoperative; postop: postoperative; CT: chemotherapy; RTx: radiotherapy; eGFR: estimated glomerular filtration rate; VA: vincristine/actinomycin-D; VAD: vincristine/actinomycin-D/doxorubicin; VA-D: vincristine/actinomycin-D/addition of doxorubicin for stable disease; VA-CE: vincristine/actinomycin-D/addition of carboplatin/etoposide for stable disease; <sup>1</sup>: no histological confirmation of diagnosis; Th: thoracic vertebra; ^: only nephrogenic rest in resection margins, no Wilms tumor cells; †: development of Wilms tumor during follow-up in a previously completely treated (suspected) nephroblastomatosis lesion; \*: diagnosis of nephroblastoma cannot be excluded, but nephrogenic rest is preferred diagnosis; <sup>2</sup>: Volume after chemotherapy was too small for reliable volume assessment; <sup>3</sup>: decrease in size of the nephrogenic rest, dimensions were not specified; FU: follow-up; NA: not applicable; RCC: renal cell carcinoma

**Table S3.** Presenting symptoms

| <b>Presenting symptom</b>                | <b>Frequency (%)</b> |
|------------------------------------------|----------------------|
| Abdominal mass                           | 14 (58%)             |
| Abdominal pain                           | 6 (25%)              |
| Asymptomatic                             | 6 (25%)              |
| Surveillance for underlying syndrome     | 5 (21%)              |
| Incidental finding upon traumatic workup | 1 (4%)               |
| Fever                                    | 2 (8%)               |
| Loss of appetite                         | 2 (8%)               |
| Hematuria                                | 1 (4%)               |
| Fatigue                                  | 1 (4%)               |
| Constipation                             | 1 (4%)               |
| Headache                                 | 1 (4%)               |

**Figure S1.** PRISMA flow diagram of article selection

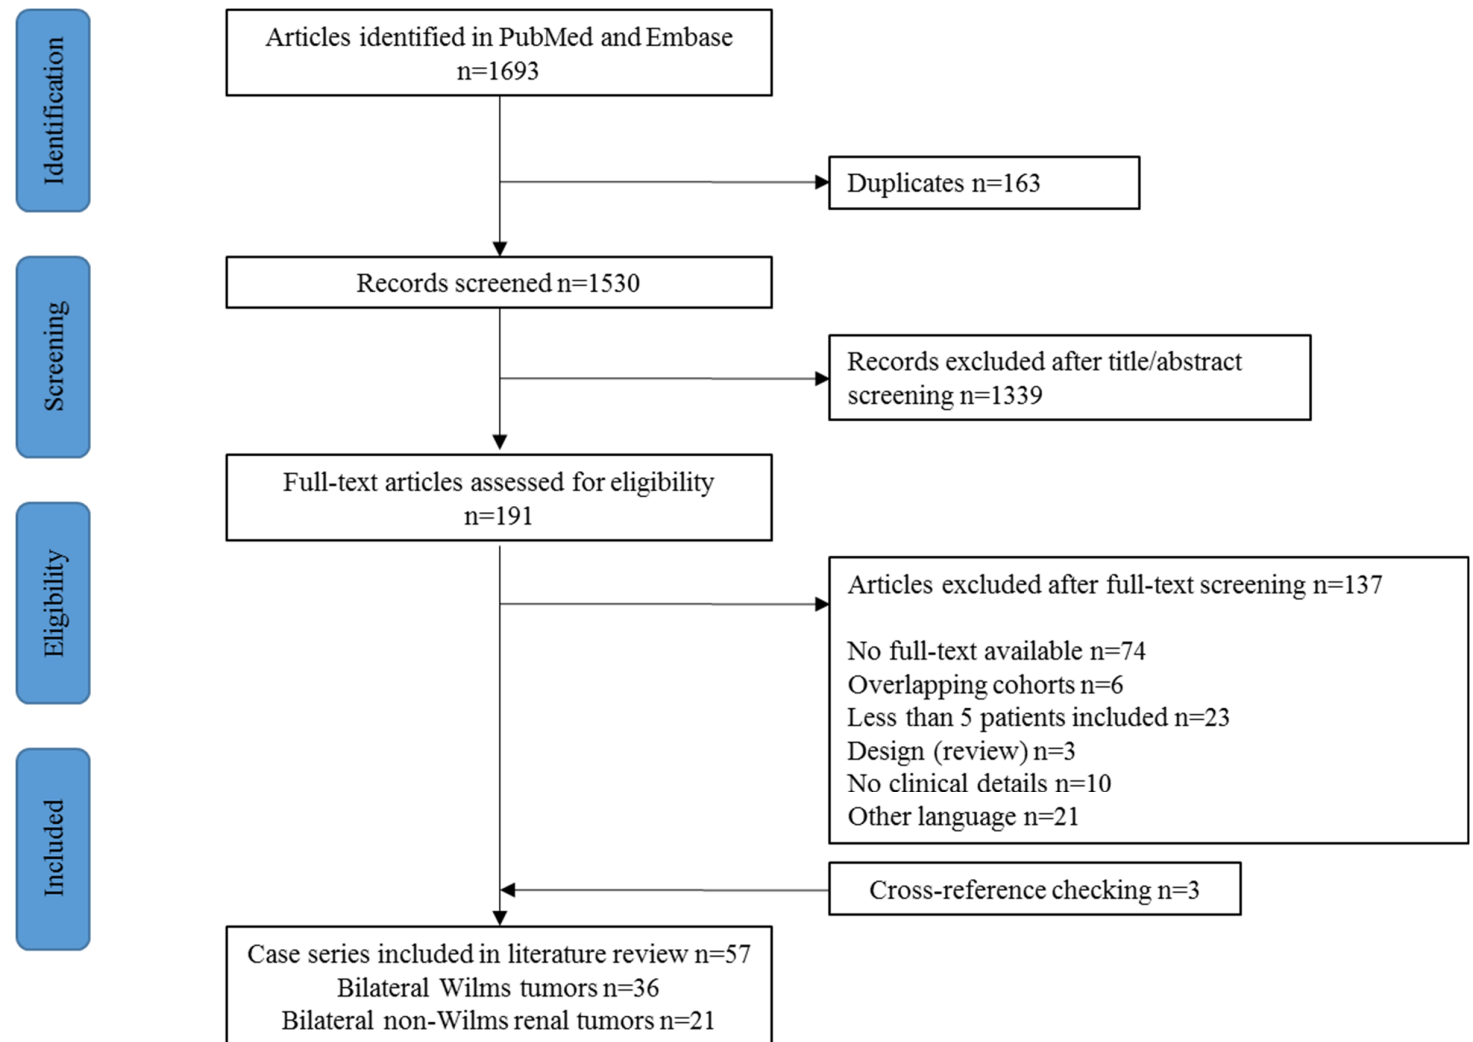

**Table S4.** Stage V renal tumor patients with metastatic disease

| <b>Author</b>        | <b>No. of patients with metastasis</b> | <b>Histology</b>                      | <b>Outcome (Histology)</b>     |
|----------------------|----------------------------------------|---------------------------------------|--------------------------------|
| Aydin 2019 [1]       | 4                                      | NA                                    | NA                             |
| Ehrlich 2017 [2]     | 27                                     | 3 anaplasia n.o.s.                    | NA (at least 3 anaplasia died) |
| Davidoff 2015 [3]    | 7                                      | At least 1 DA<br>At least 1 FH n.o.s. | 2/7 died (DA and FH)           |
| Hubertus 2015 [4]    | 4                                      | 2 blastemal, 2 NA                     | 2/4 died (blastemal)           |
| Agarwala 2014 [5]    | 3                                      | NA                                    | NA                             |
| Furtwängler 2014 [6] | 19                                     | NA                                    | NA                             |
| Oue 2014 [7]         | 2                                      | NA                                    | NA                             |
| Hadley 2013 [8]      | 4                                      | NA                                    | NA                             |
| Indolfi 2013 [9]     | 11                                     | NA (No DA)                            | NA                             |
| Sulkowski [10]       | 1                                      | NA                                    | NA                             |
| Sudour 2012 [11]     | 5                                      | NA                                    | NA                             |
| Halim 2012 [12]      | 5                                      | 3 UH n.o.s.<br>2 FH n.o.s.            | 5 (3 UH, 2 FH)                 |
| Millar 2011 [13]     | 4                                      | NA                                    | 4/4 died                       |
| Hamilton 2011 [14]   | 16                                     | NA                                    | NA                             |
| Weirich 2004 [15]    | 3                                      | NA                                    | NA                             |
| Kubiak 2004 [16]     | 4                                      | NA                                    | NA                             |
| Tomlinson 1999 [17]  | 1                                      | NA (No DA)                            | 1/1 died (NA)                  |
| Kumar 1998 [18]      | 9                                      | NA                                    | NA                             |
| Shearer 1993 [19]    | 4                                      | NA                                    | NA                             |
| Montgomery 1991 [20] | 35                                     | NA                                    | NA                             |
| Coppes 1989 [21]     | 5                                      | NA                                    | NA                             |
| Cohen 1986 [22]      | 4                                      | NA                                    | NA                             |
| Asch 1985 [23]       | 3                                      | NA (No DA)                            | 2/3 died (NA)                  |
| Jones 1982 [24]      | 4                                      | NA (No DA)                            | 4/4 died (NA)                  |
| This cohort, 2021    | 4                                      | 1 Regressive bilateral                | 1/4 died (DA)                  |

|              |     |                       |            |
|--------------|-----|-----------------------|------------|
|              |     | 1 Blastemal + stromal |            |
|              |     | 2 bilateral DA        |            |
| <b>Total</b> | 188 | 162 NA, 16 specified  | 24/35 died |

No.: number; NA: not available; DA: diffuse anaplasia; FH: favorable histology; n.o.s.: not otherwise specified; UH: unfavorable histology.



## References

1. Aydin, B.; Akyuz, C.; Yalcin, B.; Ekinci, S.; Oguz, B.; Akcoren, Z.; Yildiz, F.; Varan, A.; Kurucu, N.; Buyukpamukcu, M.; et al. Bilateral Wilms tumors: Treatment results from a single center. *Turk. J. Pediatr.* **2019**, *61*, 44-51, doi:10.24953/turkjped.2019.01.008.
2. Ehrlich, P.; Chi, Y.Y.; Chintagumpala, M.M.; Hoffer, F.A.; Perlman, E.J.; Kalapurakal, J.A.; Warwick, A.; Shamberger, R.C.; Khanna, G.; Hamilton, T.E.; et al. Results of the First Prospective Multi-institutional Treatment Study in Children With Bilateral Wilms Tumor (AREN0534): A Report From the Children's Oncology Group. *Ann. Surg.* **2017**, *266*, 470-478, doi:10.1097/SLA.0000000000002356.
3. Davidoff, A.M.; Interiano, R.B.; Wynn, L.; Delos Santos, N.; Dome, J.S.; Green, D.M.; Brennan, R.C.; McCarville, M.B.; Krasin, M.J.; Kieran, K.; et al. Overall Survival and Renal Function of Patients With Synchronous Bilateral Wilms Tumor Undergoing Surgery at a Single Institution. *Ann. Surg.* **2015**, *262*, 570-576, doi:10.1097/SLA.0000000000001451.
4. Hubertus, J.; Gunther, B.; Becker, K.; Graf, N.; Furtwangler, R.; Ferrari, R.; Gruhn, B.; Stahl, R.; von Schweinitz, D.; Stehr, M. Development of hypertension is less frequent after bilateral nephron sparing surgery for bilateral Wilms tumor in a long-term survey. *J. Urol.* **2015**, *193*, 262-266, doi:10.1016/j.juro.2014.07.116.
5. Agarwala, S.; Mittal, D.; Bhatnagar, V.; Srinivas, M.; Bakhshi, S.; Bajpai, M.; Gupta, D.K.; Iyer, V.K.; Mohanti, B.K.; Thulkar, S. Management and outcomes in massive bilateral Wilms' tumors. *J. Indian Assoc. Pediatr. Surg.* **2014**, *19*, 208-212, doi:10.4103/0971-9261.142005.
6. Furtwangler, R.; Schmolze, M.; Graber, S.; Leuschner, I.; Amann, G.; Schenk, J.P.; Niggli, F.; Kager, L.; von Schweinitz, D.; Graf, N. Pretreatment for bilateral nephroblastomatosis is an independent risk factor for progressive disease in patients with stage V nephroblastoma. *Klin. Padiatr.* **2014**, *226*, 175-181, doi:10.1055/s-0034-1371840.
7. Oue, T.; Koshinaga, T.; Okita, H.; Kaneko, Y.; Hinotsu, S.; Fukuzawa, M. Bilateral Wilms tumors treated according to the Japan Wilms Tumor Study Group protocol. *Pediatr. Blood Cancer* **2014**, *61*, 1184-1189, doi:10.1002/pbc.24979.
8. Hadley, G.P.; Mars, M.; Ramdial, P.K. Bilateral Wilms' tumour in a developing country: a descriptive study. *Pediatr. Surg. Int.* **2013**, *29*, 419-423, doi:10.1007/s00383-013-3287-7.
9. Indolfi, P.; Jenkner, A.; Terenziani, M.; Crocoli, A.; Serra, A.; Collini, P.; Biondi, D.; Gandola, L.; Bisogno, G.; Cecchetto, G.; et al. Synchronous bilateral Wilms tumor: a report from the Associazione Italiana Ematologia Oncologia Pediatrica (AIEOP). *Cancer* **2013**, *119*, 1586-1592, doi:10.1002/cncr.27897.
10. Sulkowski, J.; Kolon, T.; Mattei, P. Nephron-sparing partial nephrectomy for bilateral Wilms' tumor. *J. Pediatr. Surg.* **2012**, *47*, 1234-1238, doi:10.1016/j.jpedsurg.2012.03.032.
11. Sudour, H.; Audry, G.; Schleimacher, G.; Patte, C.; Dussart, S.; Bergeron, C. Bilateral Wilms tumors (WT) treated with the SIOP 93 protocol in France: epidemiological survey and patient outcome. *Pediatr. Blood Cancer* **2012**, *59*, 57-61, doi:10.1002/pbc.24059.
12. Halim, A.; Elashry, R.; Soliman, O.; Sarhan, O. Bilateral Wilms' tumor: Mansoura multi-centers 15 years experience. *J. Oncol. Pharm. Pract.* **2012**, *18*, 115-121, doi:10.1177/1078155210396575.
13. Millar, A.J.W.; Davidson, A.; Rode, H.; Numanoglu, A.; Hartley, P.S.; Desai, F. Nephron-sparing surgery for bilateral Wilms' tumours: a single-centre experience with 23 cases. *Afr. J. Paediatr. Surg.* **2011**, *8*, 49-56, doi:10.4103/0189-6725.78669.
14. Hamilton, T.E.; Ritchey, M.L.; Haase, G.M.; Argani, P.; Peterson, S.M.; Anderson, J.R.; Green, D.M.; Shamberger, R.C. The management of synchronous bilateral Wilms tumor: a report from the National Wilms Tumor Study Group. *Ann. Surg.* **2011**, *253*, 1004-1010, doi:10.1097/SLA.0b013e31821266a0.
15. Weirich, A.; Ludwig, R.; Graf, N.; Abel, U.; Leuschner, I.; Vujanic, G.M.; Mehls, O.; Boos, J.; Beck, J.; Royer-Pokora, B.; et al. Survival in nephroblastoma treated according to the trial and study SIOP-9/GPOH with respect to relapse and morbidity. *Ann. Oncol.* **2004**, *15*, 808-820, doi:10.1093/annonc/mdh171.
16. Kubiak, R.; Gundeti, M.; Duffy, P.G.; Ransley, P.G.; Wilcox, D.T. Renal function and outcome following salvage surgery for bilateral Wilms' tumor. *J. Pediatr. Surg.* **2004**, *39*, 1667-1672, doi:10.1016/j.jpedsurg.2004.07.009.
17. Tomlinson, G.S.; Cole, C.H.; Smith, N.M. Bilateral Wilms' tumor: a clinicopathologic review. *Pathology* **1999**, *31*, 12-16, doi:10.1080/003130299105458.
18. Kumar, R.; Fitzgerald, R.; Breatnach, F. Conservative surgical management of bilateral Wilms tumor: results of the United Kingdom Children's Cancer Study Group. *J. Urol.* **1998**, *160*, 1450-1453, doi:10.1016/s0022-5347(01)62588-6.

19. Shearer, P.; Parham, D.M.; Fontanesi, J.; Kumar, M.; Lobe, T.E.; Fairclough, D.; Douglass, E.C.; Wilimas, J. Bilateral Wilms tumor. Review of outcome, associated abnormalities, and late effects in 36 pediatric patients treated at a single institution. *Cancer* **1993**, *72*, 1422-1426, doi:10.1002/1097-0142(19930815)72:4<1422::aid-cncr2820720443>3.0.co;2-e.
20. Montgomery, B.T.; Kelalis, P.P.; Blute, M.L.; Bergstralh, E.J.; Beckwith, J.B.; Norkool, P.; Green, D.M.; D'Angio, G.J. Extended Followup of Bilateral Wilms Tumor: Results of the National Wilms Tumor Study. *J. Urol.* **1991**, *146*, 514-518, doi:10.1016/s0022-5347(17)37840-0.
21. Coppes, M.J.; de Kraker, J.; van Dijken, P.J.; Perry, H.J.; Delemarre, J.F.; Tournade, M.F.; Lemerle, J.; Voûte, P.A. Bilateral Wilms' tumor: long-term survival and some epidemiological features. *J. Clin. Oncol.* **1989**, *7*, 310-315, doi:10.1200/JCO.1989.7.3.310.
22. Cohen, R.C.; Kelly, J.H.; Chan, H.S.L.; Mancer, K.; Weitzman, S.; Daneman, A.; Filler, R.M. Treatment and prognosis of 32 patients with bilateral Wilms' tumor. *Pediatr. Surg. Int.* **1986**, *1*, 110-116, doi:10.1007/BF00166871.
23. Asch, M.J.; Siegel, S.; White, L.; Fonkalsrud, E.; Hays, D.; Isaacs, H. Prognostic Factors and Outcome in Bilateral Wilms' Tumor. *Cancer* **1985**, *56*, 2524-2529, doi:10.1002/1097-0142(19851115)56:10<2524::aid-cncr2820561034>3.0.co;2-x.
24. Jones, B.; Hrabrovski, E.; Kiviat, N.; Breslow, N.E. Metachronous bilateral Wilms' tumor, National Wilms' Tumor Study. *Am. J. Clin. Oncol.* **1982**, *5*, 545-550.
